# Supplementary material
Source: PubMed Central journal article supplement (PMC2924052)

## **SUPPLEMENTAL MATERIAL**

**FIGURE S1. Proteasome inhibition with MG132 leads to cytosolic aggregates of ubiquitinated TDP-43.** COS7 cells were transfected with N-terminal Cherry-tagged TDP-43 (Ch-TDP43 – red), and immunostained for ubiquitin (FK2 – green) after being treated with 10 $\mu$ M MG132 (proteasome inhibitor) for 16 hours. Cells treated with MG132 showed a single ubiquitin positive perinuclear aggresome. TDP-43 was present in perinuclear inclusions were observed in ~23% of transfected cells. Arrows indicate TDP-43 positive ubiquitinated aggregates.

**FIGURE S2. TDP-43 or TDP-43 fragments do not affect HeLa cell viability in FRET or filter trap assays.** *A*, cells were plated in 96-well plates and transfected the next day as for FRET experiments. Cell viability was determined by MTS reduction 48h after transfection, and is represented as % of mCherry-transfected cells. *B*, cells were plated at 200,000 cells/well in 6-well dishes and transfected as in FRET experiments. After 48h, no activated Caspase-3 was detected by Western blot (self cleavage product). A lysate from cells treated with staurosporine (0.5  $\mu$ M, 3 h) or vehicle are shown as controls.

Figure S1

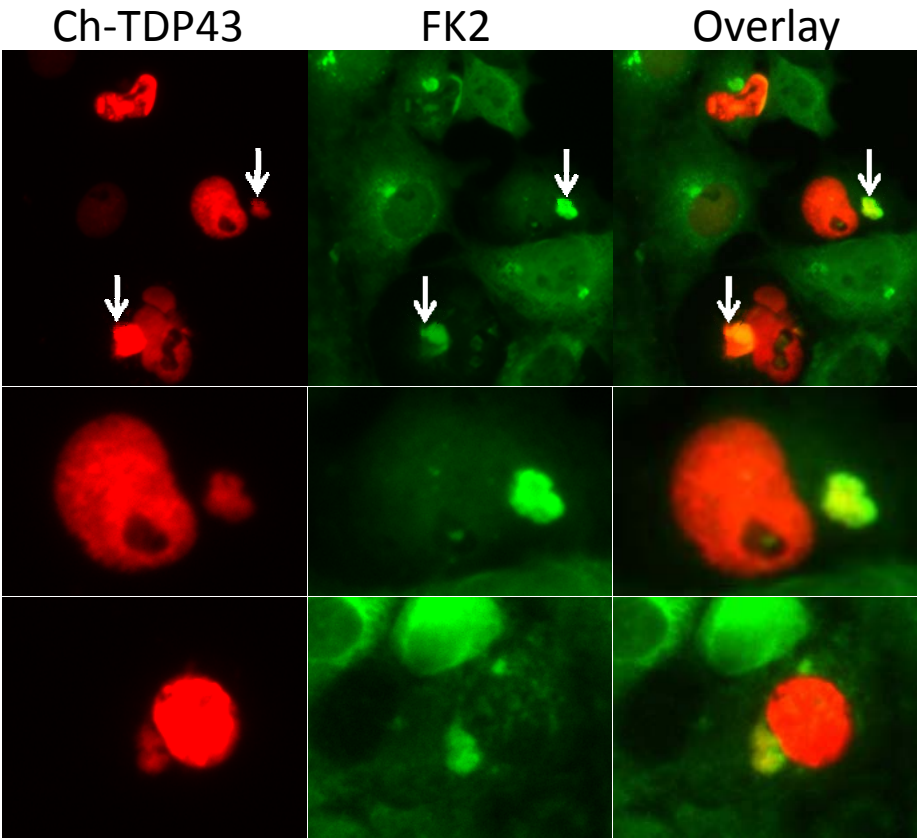

**A**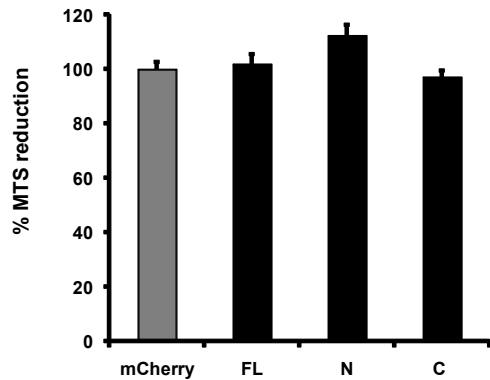**B**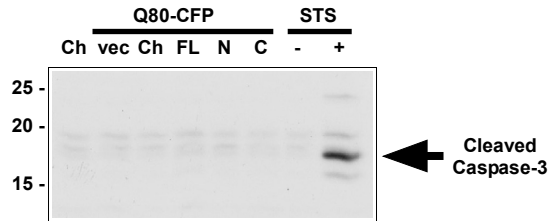

Supplement: supp_M110.125039_jbc.M110.125039-1.pdf [file supp_M110.125039_jbc.M110.125039-1.pdf]
